# Supplementary material
Source: PubMed Central journal article supplement (PMC4783270)

## ONLINE REPOSITORY

**Title:** Association of Eosinophilic Esophagitis and Hypertrophic Cardiomyopathy

Authors:

Benjamin P. Davis, MD<sup>a</sup>  
Tolly Epstein, MD MS<sup>b,c</sup>  
Leah Kottyan, PhD<sup>a</sup>  
Priyal Amin, DO<sup>b</sup>  
Lisa J. Martin, PhD<sup>d</sup>  
Avery Maddox<sup>a</sup>  
Margaret H. Collins, MD<sup>e</sup>  
Joseph D. Sherrill, PhD<sup>a</sup>  
Pablo Abonia, MD<sup>a</sup>  
Marc Rothenberg, MD PhD<sup>a</sup>

**Supplementary Figure 1.** Relative expression of calreticulin 3 (CALR3) is decreased by 17% ( $p=0.001$ ) by microarray in the epithelial biopsies of EoE patients ( $n = 18$ ) compared to normal control biopsies ( $n = 14$ ). Error bars represent standard error of the means (s.e.m.)

**Supplementary Table 1.** Summary of patients with hypertrophic cardiomyopathy and eosinophilic esophagitis

| Patient Identifier (Sex) | Cardiology History |                                                                                                                                        |                          | Gastroenterology History |                                      |            |                          | Genetics       |                                       | Other Significant History                                                                                   |
|--------------------------|--------------------|----------------------------------------------------------------------------------------------------------------------------------------|--------------------------|--------------------------|--------------------------------------|------------|--------------------------|----------------|---------------------------------------|-------------------------------------------------------------------------------------------------------------|
|                          | Diagnosis          | TTE Findings                                                                                                                           | Age at Diagnosis (years) | Diagnosis                | Peak Intraepithelial Count (Eos/hpf) | Failed PPI | Age at Diagnosis (years) | Locus          | Mutation                              |                                                                                                             |
| 1 <sup>a</sup> (M)       | HCM                | basal septal hypertrophy of 19 mm, LVOT obstruction                                                                                    | 33; symptom onset age 28 | EoE                      | 120                                  | Yes        | 30; symptom onset age 23 | <i>MYPBC3</i>  | c.1624G>C, p.E542Q                    | allergic rhinitis<br>asthma                                                                                 |
| 2 (M)                    | HCM                | LV diastolic septal thickness Z score of 5.13, LV diastolic wall thickness Z score of 2.93, LV systolic wall thickness Z score of 2.95 | 1                        | EoE                      | 93                                   | Yes        | 17                       | Unknown        | N/A                                   | familial osteogenesis imperfecta I (grandmother, mother, sister, and brother affected)<br>septal myomectomy |
| 3 (M)                    | HCM                | LV diastolic wall thickness Z score of 2.39                                                                                            | 21                       | EoE                      | 15 (on GJ tube feeds)                | Yes        | 20                       | Chr 1 deletion | 10.88-Mb deletion, 1p36.33 to 1p36.22 | 1p36 syndrome<br>septal myomectomy                                                                          |

Abbreviation: EoE, eosinophilic esophagitis; Eos, eosinophils; HCM, hypertrophic cardiac myopathy; hpf, high-power field; M, male; TTE, transthoracic echocardiography; PPI, proton pump inhibitor; Chr, chromosome; N/A, not applicable, mm, millimeters; LVOT, left ventricular outflow tract; LV, left ventricular; GJ, gastrojejunostomy.

<sup>a</sup> Index patient

**Supplementary Table 2.** Demographics of eosinophilic esophagitis and control cohorts of candidate-gene association study

|           | <b>CCHMC EoE</b>    | <b>CoFAR EoE</b>    | <b>CGCC Control</b> | <b>dbGaP Control</b> |
|-----------|---------------------|---------------------|---------------------|----------------------|
| Sex (n)   |                     |                     |                     |                      |
| Males     | 376                 | 150                 | 376                 | 3,479                |
| Females   | 138                 | 72                  | 384                 | 5,007                |
| Age Range | 3 months - 60 years | 6 months - 65 years | 2-18 years          | > 50 years           |

Abbreviation: CCHMC, Cincinnati Children's Hospital Medical Center; CGCC, Cincinnati Genomic Control Cohort; CoFAR, Consortium of Food Allergy Research; dbGaP, Database of Genotypes and Phenotypes; EoE, eosinophilic esophagitis

30% of CCHMC and 51% of CoFAR cases had proton pump inhibitor (PPI) therapy before diagnostic endoscopy. Control subjects (without EoE) included the self-reported Caucasian subjects in the Cincinnati Genomic Control Cohort (CGCC) ( $n = 760$ ; age range of 2-18 years) and an external control cohort (without EoE) acquired from a Database of Genotypes and Phenotypes (dbGaP) University of Michigan study ( $n = 8,486$ ). In the CCHMC and CoFAR cohorts, 73% and 68% of EoE cases were male, respectively, and EoE cases had an age range of 3 months-60 years. The external control cohort (dbGaP) was collected through an aging and retirement study; subjects in this control cohort were typically older than the patients with EoE at the time of DNA collection.

**Supplementary Table 3.** Association between single-nucleotide polymorphisms in the *MYBPC3* gene and eosinophilic esophagitis<sup>a</sup>

| SNP         | Genomic Region | Affected MAF | Unaffected MAF | Permutated <sup>b</sup> P value | Adjusted OR |
|-------------|----------------|--------------|----------------|---------------------------------|-------------|
| rs11570053  | 47371261       | 0.001        | 0.000          | 0.0004                          | NA          |
| rs182114979 | 47319500       | 0.001        | 0.000          | 0.0011                          | 12.60       |
| rs34937994  | 47389638       | 0.395        | 0.352          | 0.0020                          | 1.20        |
| rs141947880 | 47385350       | 0.035        | 0.022          | 0.0038                          | 1.63        |
| rs3824869   | 47378245       | 0.382        | 0.343          | 0.0041                          | 1.18        |
| rs11601200  | 47395209       | 0.035        | 0.022          | 0.0041                          | 1.62        |
| rs2278890   | 47399602       | 0.390        | 0.353          | 0.0071                          | 1.17        |
| rs12801188  | 47388214       | 0.385        | 0.349          | 0.0078                          | 1.17        |
| rs11570094  | 47359706       | 0.267        | 0.303          | 0.0110                          | 0.84        |
| rs118134583 | 47323727       | 0.014        | 0.024          | 0.0121                          | 0.57        |
| rs200416580 | 47332836       | 0.014        | 0.024          | 0.0122                          | 0.57        |
| rs75994385  | 47310397       | 0.014        | 0.024          | 0.0136                          | 0.57        |
| rs3729986   | 47371598       | 0.083        | 0.064          | 0.0138                          | 1.33        |
| rs3740689   | 47380593       | 0.428        | 0.477          | 0.0140                          | 0.82        |
| rs11570041  | 47374633       | 0.014        | 0.025          | 0.0144                          | 0.58        |
| rs117847273 | 47379023       | 0.014        | 0.025          | 0.0146                          | 0.58        |
| rs75958295  | 47347644       | 0.010        | 0.019          | 0.0166                          | 0.54        |
| rs202076451 | 47377516       | 0.081        | 0.101          | 0.0222                          | 0.78        |
| rs10747     | 47376544       | 0.018        | 0.028          | 0.0253                          | 0.63        |
| rs11570034  | 47375889       | 0.018        | 0.028          | 0.0253                          | 0.63        |
| rs6485749   | 47332875       | 0.001        | 0.000          | 0.0317                          | 5.04        |
| rs11039176  | 47339169       | 0.011        | 0.019          | 0.0377                          | 0.59        |
| rs6485752   | 47374911       | 0.016        | 0.024          | 0.0444                          | 0.65        |
| rs75350544  | 47333729       | 0.011        | 0.018          | 0.0449                          | 0.60        |

Abbreviation: SNP, single-nucleotide polymorphism dbSNP ID; MAF, minor allele frequency; P value, probability from a logistic regression analysis; OR, odds ratio; *MYBPC3*, cardiac myosin-binding protein C3.

<sup>a</sup>Genome-wide association study using 736 eosinophilic esophagitis cases and 9,246 control cases

<sup>b</sup>Data represents one locus tested by an a priori hypothesis for *MYBPC3*'s association with EoE. Therefore, permutation analysis, rather than multiple testing correction, was performed.

**Supplementary Table 4.** Hypertrophic Cardiomyopathy–Causing Genes having Common Variants Associated with Eosinophilic Esophagitis

| Gene                                                  | Function                                                                                                                                                              | Chr | SNP <sup>a</sup> | BP        | Minor Allele | MAF EoE | MAF Control | Major Allele | P Value | OR   |
|-------------------------------------------------------|-----------------------------------------------------------------------------------------------------------------------------------------------------------------------|-----|------------------|-----------|--------------|---------|-------------|--------------|---------|------|
| Actin, alpha, cardiac muscle 1 ( <i>ACTC1</i> )       | found in muscle tissues and a major constituent of the contractile apparatus                                                                                          | 15  | rs113887107      | 35108264  | A            | 0.063   | 0.083       | G            | 0.0201  | 0.75 |
| Actinin, alpha 2 ( <i>ACTN2</i> )                     | actin-binding protein with multiple roles in different cell types                                                                                                     | 1   | rs10925210       | 236906807 | T            | 0.387   | 0.352       | A            | 0.0171  | 1.16 |
| Calreticulin 3 ( <i>CALR3</i> )                       | calcium-binding chaperones localized mainly in the endoplasmic reticulum                                                                                              | 19  | rs45510495       | 16620302  | A            | 0.017   | 0.027       | G            | 0.0456  | 0.63 |
| Calsequestrin 2 ( <i>CASQ2</i> )                      | calcium-binding protein that stores calcium for muscle function                                                                                                       | 1   | rs3810998        | 116311924 | A            | 0.265   | 0.305       | C            | 0.0046  | 0.82 |
| Caveolin 3 ( <i>CAV3</i> )                            | component of the caveolae plasma membranes found in most cell types                                                                                                   | 3   | rs12631502       | 8803700   | G            | 0.166   | 0.135       | A            | 0.0035  | 1.27 |
| Cysteine- and glycine-rich protein 3 ( <i>CSRP3</i> ) | may be involved in regulatory processes important for development and cellular differentiation                                                                        | 11  | rs74756565       | 19215569  | C            | 0.033   | 0.018       | A            | 0.0001  | 1.84 |
| Junctophilin 2 ( <i>JPH2</i> )                        | junctional complexes between the plasma membrane and endoplasmic/sarcoplasmic reticulum ,which mediate cross talk between cell surface and intracellular ion channels | 20  | rs6017273        | 42778766  | G            | 0.145   | 0.179       | A            | 0.0033  | 0.78 |
| LIM domain binding 3 ( <i>LDB3</i> )                  | interacts with alpha-actinin-2 through its N-terminal PDZ domain and with protein kinase C via its C-terminal LIM domains                                             | 10  | rs12570666       | 88510097  | G            | 0.252   | 0.288       | A            | 0.0099  | 0.83 |
| Myosin, heavy chain ( <i>MYH7, MYH6</i> )             | changes in the relative abundance of this protein and the alpha (or fast) heavy subunit of cardiac myosin correlate with the contractile velocity of                  | 14  | rs11465523       | 23845754  | A            | 0.050   | 0.037       | G            | 0.0278  | 1.37 |

| cardiac muscle                           |                                                                                  |    |             |           |   |       |       |   |        |      |
|------------------------------------------|----------------------------------------------------------------------------------|----|-------------|-----------|---|-------|-------|---|--------|------|
| Myosin, light chain 2<br>( <i>MYL2</i> ) | regulatory light chain associated with cardiac myosin beta (or slow) heavy chain | 12 | rs116876453 | 111341702 | C | 0.026 | 0.038 | A | 0.0462 | 0.68 |
| Troponin C type 1<br>( <i>TNNC1</i> )    | central regulatory protein of striated muscle contraction                        | 3  | rs62257617  | 52492601  | A | 0.066 | 0.052 | G | 0.0398 | 1.29 |
| Tropomyosin 1<br>( <i>TPM1</i> )         | provides stability to actin filaments                                            | 15 | rs2414814   | 63362379  | A | 0.054 | 0.041 | C | 0.0348 | 1.33 |
| Titin<br>( <i>TTN</i> )                  | adhesion template for the assembly of contractile machinery in muscle cells      | 2  | rs2054708   | 179645577 | G | 0.052 | 0.075 | A | 0.0053 | 0.68 |

Abbreviation: Chr, chromosome; EoE, eosinophilic esophagitis; MAF, minor allele frequency; OR, odds ratio; SNP, single-nucleotide polymorphism; BP, base pair

<sup>a</sup>The listed SNP is the most significant association in each region

Supplementary Figure 1

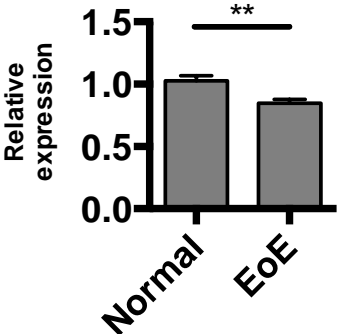

Supplement: NIHMS729099-supplement-supplement_1.pdf [file NIHMS729099-supplement-supplement_1.pdf]
